# Supplementary material
Source: HighWire-hosted journal article supplement (https://www.cmaj.ca/highwire/filestream/76992/field_highwire_adjunct_files/0/200193-res-1-at.pdf)
Supplement: 200193-res-1-at.pdf [file 200193-res-1-at.pdf]

## Appendix 1 (as supplied by the authors): Supplemental material

**Supplemental Table S1: Guideline groups and panelists involved in item generation surveys**

| Guideline Organization                                                                        | Number of Respondents |
|-----------------------------------------------------------------------------------------------|-----------------------|
| Kingdom of Saudi Arabia Ministry of Health Guidelines 2014                                    | 38                    |
| World Health Organization 2013                                                                | 10                    |
| World Health Organization 2014                                                                | 11                    |
| ATS/ERS/JRS/ALAT Clinical Practice Guideline: Treatment of Idiopathic Pulmonary Fibrosis 2014 | 3                     |

**Supplemental Table S2: Key informants involved in item reduction and item and response phrasing**

| Sampling                                                 | Number of Respondents | Previously Participated in a Guideline (%) | Field of Work* |              |                    |                  |              |
|----------------------------------------------------------|-----------------------|--------------------------------------------|----------------|--------------|--------------------|------------------|--------------|
|                                                          |                       |                                            | Clinical (%)   | Research (%) | Administrative (%) | Policymaking (%) | Teaching (%) |
| <b>Item Reduction</b>                                    |                       |                                            |                |              |                    |                  |              |
| WHO, WAO, CCO, EHIF panelists and methodologists         | 22                    | 91                                         | 68             | 91           | 23                 | 32               | 59           |
| <b>Item and Response Phrasing</b>                        |                       |                                            |                |              |                    |                  |              |
| Guideline workshops and AGA panelists and methodologists | 26                    | 72                                         | 72             | 56           | 8                  | 2                | 4            |

\* participants were able to select more than one category

Abbreviations:

AGA - American Gastroenterological Association; CCO – Cancer Care Ontario; EHIF – Estonian Health Insurance Fund; WAO – World Allergy Organization; WHO – World Health Organization

**Supplemental Table S3: Guideline panels involved in field testing the PANELVIEW tool**

| Guideline Organization                                                                   | Guideline Topic                                     | Date              | Number of Respondents | Previously Participated in a Guideline (%) | Field of Work* |              |                    |                  |              |
|------------------------------------------------------------------------------------------|-----------------------------------------------------|-------------------|-----------------------|--------------------------------------------|----------------|--------------|--------------------|------------------|--------------|
|                                                                                          |                                                     |                   |                       |                                            | Clinical (%)   | Research (%) | Administrative (%) | Policymaking (%) | Teaching (%) |
| National Hemophilia Foundation<br><i>(pilot guideline group)</i>                         | Care models for haemophilia management              | July 7, 2015      | 12                    | 33                                         | 67             | 67           | 42                 | 17               | 50           |
| AABB<br><i>(formerly American Association of Blood Banks)</i>                            | Red blood cell transfusion                          | January 7, 2016   | 14                    | 93                                         | 86             | 64           | 29                 | 21               | 36           |
| American Dental Association                                                              | Sealants                                            | January 22, 2016  | 8                     | 38                                         | 88             | 75           | 63                 | 25               | 63           |
| Rheumatoid Arthritis Guideline Adaptation for the Eastern Mediterranean Region           | Treatment of rheumatoid arthritis                   | May 27, 2016      | 17                    | 47                                         | 94             | 65           | 47                 | 0                | 59           |
| RARE-Bestpractices                                                                       | Sickle cell disease                                 | July 11, 2016     | 8                     | 75                                         | 75             | 88           | 38                 | 0                | 63           |
| McMaster RARE-Bestpractices                                                              | Catastrophic antiphospholipid syndrome              | April 26, 2017    | 13                    | 77                                         | 92             | 69           | 23                 | 0                | 38           |
| World Health Organization                                                                | Policy guidance on the use of delamanid in children | May 4, 2017       | 13                    | 54                                         | 85             | 92           | 46                 | 15               | 77           |
| Rheumatoid Arthritis Guideline Adaptation for the Eastern Mediterranean Region – Panel 2 | Treatment of rheumatoid arthritis                   | July 7, 2017      | 12                    | 58                                         | 100            | 67           | 50                 | 0                | 83           |
| World Health Organization                                                                | Health workers guideline                            | December 15, 2017 | 9                     | 11                                         | 33             | 44           | 56                 | 56               | 67           |

\* participants were able to select more than one category

**Supplemental Table S4: Initial list of items and domains prior to item reduction**

| <b>Administration</b>                                                                                                                                                   |
|-------------------------------------------------------------------------------------------------------------------------------------------------------------------------|
| 1. Logistical support provided for organization for the panel meeting(s) (e.g. scheduling of meeting, setting agenda, booking travel, processing of expenses)           |
| 2. Planning, preparatory meetings, conference calls prior to final panel meeting(s)                                                                                     |
| 3. Location and venue for panel meeting(s)                                                                                                                              |
| 4. Adequate time given for guideline group members to complete tasks (e.g. completing surveys, providing input, etc.) throughout development of the guideline           |
| 5. Adequate duration of panel meeting(s) and time allotted for all guideline questions to be discussed and recommendations to be formulated                             |
| 6. Materials being sent in advance with adequate time to review the evidence summary and other material prior to panel meeting                                          |
| 7. Panel meeting(s) have clearly defined objectives and agenda                                                                                                          |
| 8. The number of meetings held throughout the development of the guideline                                                                                              |
| <b>Training</b>                                                                                                                                                         |
| 9. Training received about the specific methodology and frameworks to be used to develop the guideline in preparation for panel meeting(s)                              |
| 10. The purpose and objectives of the entire guideline development project are clearly communicated to the guideline development group members                          |
| 11. Information is provided to ensure understanding of the overall process and steps that will be used to develop the guideline                                         |
| <b>Panel Chair</b>                                                                                                                                                      |
| 12. Panel Chair's subject matter knowledge and expertise                                                                                                                |
| 13. Clear communication by panel Chair; easy to understand                                                                                                              |
| 14. Time management at the panel meeting(s) by the Chair; following agenda, staying on task and ensuring completion                                                     |
| 15. Chair's ability to facilitate discussion, keeping discussion on topic, providing direction and support for decision-making, and maintaining fidelity of the process |
| 16. Chair's ability to establish atmosphere of support that ensures involvement of all panel members in discussion and free expression of opinions                      |
| 17. Chair's ability to manage group process and dynamics, and awareness of social, power, and knowledge influences in the group                                         |
| 18. Chair's ability to provide methodological guidance during panel meeting and adhere to the outlined methods and process                                              |
| <b>Conflict of Interest</b>                                                                                                                                             |
| 19. Panel members completing Declaration of Interests (e.g. COI)                                                                                                        |
| 20. Management of potential conflicts of interest (financial, academic) and influence of networks that group members might mobilize during discussion                   |
| 21. Management of bias in panel members' interpretation of evidence and alignment with prior beliefs                                                                    |
| 22. Independence of panel's decisions from the sponsoring guideline development organization's potential interests and influence                                        |
| 23. Evidence synthesis (e.g. systematic review) completed independently                                                                                                 |
| <b>Methodology &amp; Process</b>                                                                                                                                        |
| 24. Rigour of the evidence synthesis                                                                                                                                    |

|                                                                                                                                             |
|---------------------------------------------------------------------------------------------------------------------------------------------|
| 25. Use of evidence in the formulation of recommendations for the guideline                                                                 |
| 26. Having specific procedures and methodology guiding the development of the guideline (e.g. as outlined in a handbook)                    |
| 27. Adherence to the agreed on guideline development process and methods                                                                    |
| 28. Guideline development process and methods are transparent and communicated clearly to guideline group members                           |
| 29. Involvement of panel members in evidence synthesis and contributing information                                                         |
| 30. Involvement of and consultation with key stakeholders                                                                                   |
| <b>Scoping the Guideline</b>                                                                                                                |
| 31. Involvement of <b>all</b> guideline development group members in prioritization of questions and scoping of the guideline               |
| 32. The method used to decide on the scope of the guideline (e.g. literature search, rating exercise, stakeholder consultation)             |
| 33. Final scope of the guideline clearly communicated to the guideline development group and agreement sought                               |
| <b>Considering the Evidence and Contributing through Expertise</b>                                                                          |
| 34. Methods for considering the evidence were consistent and transparent, such as through the use of a framework                            |
| 35. Evidence summary is made available to panel members                                                                                     |
| 36. The prepared evidence summary is transparent and usable for discussion (e.g. knowing where research evidence came from)                 |
| 37. The quality of the evidence that is used to support the guideline recommendations                                                       |
| 38. How evidence is considered and balanced with panel members' input and expert experience                                                 |
| 39. The method or process that is used for decision-making in the absence of evidence, or with insufficient evidence                        |
| 40. The method or process that is used for decision-making with low quality evidence                                                        |
| 41. Appropriate consideration is given to all relevant types of evidence                                                                    |
| 42. Panel members able to provide input and contribute through own expertise and experience                                                 |
| 43. How patients' views, perspectives, values, preferences are considered                                                                   |
| <b>Formulating the Recommendations</b>                                                                                                      |
| 44. The method for formulating the recommendations, such as the use of a framework                                                          |
| 45. Transparency of judgements made and providing underlying assumptions and extent of agreement in formulating recommendations             |
| 46. Considering setting-specific healthcare factors in formulating the guideline recommendations                                            |
| 47. Considering individual patients' needs and goals when formulating the recommendations                                                   |
| 48. Considering the acceptability of the recommendations by end users                                                                       |
| 49. Considering policy implications and how recommendations are formulated for politically contentious topics                               |
| 50. Considering the potential of recommendations to impact system change                                                                    |
| 51. The approach used for wording the recommendation statements                                                                             |
| 52. Agreement by all panel members on the final recommendations                                                                             |
| 53. Sufficient explanation of the formulated recommendations to all panel members                                                           |
| 54. Transparency of the process from going from the panel's recommendation to the final recommendation that appears in the guideline report |
| 55. No changes being to the recommendations after the panel meeting or when agreement was reached                                           |

|                                                                                                                                                                                                          |
|----------------------------------------------------------------------------------------------------------------------------------------------------------------------------------------------------------|
| <b>Consensus</b>                                                                                                                                                                                         |
| 56. The consensus method used by the panel is appropriate, allowing for consensus with diversity of views and not disguising disagreement                                                                |
| 57. The panel's ability to reach consensus                                                                                                                                                               |
| 58. There is awareness of potential compliance that may lead to spurious consensus                                                                                                                       |
| <b>Group Composition</b>                                                                                                                                                                                 |
| 59. The structure of the guideline development group (e.g. may involve a steering committee for logistical and administrative support, patient representatives, internal and external stakeholder, etc.) |
| 60. Diversity in membership and adequate representation of backgrounds and specialties in the panel composition                                                                                          |
| 61. The levels and balance of expertise and methodological support in the panel composition                                                                                                              |
| 62. Having patient representatives on the panel                                                                                                                                                          |
| 63. Group size is less than 20 members                                                                                                                                                                   |
| <b>Group Roles</b>                                                                                                                                                                                       |
| 64. Group members' roles, responsibilities, and tasks are made clear                                                                                                                                     |
| 65. The amount of workload and responsibilities for group members                                                                                                                                        |
| 66. Attendance of all members in the panel meeting(s) (e.g. essential expertise not missing due to panel members' absence)                                                                               |
| 67. Appropriate involvement of group members throughout the guideline development process                                                                                                                |
| 68. Group members adhering to assigned roles and rules                                                                                                                                                   |
| 69. Appropriate contribution of group members based on their roles, knowledge and expertise                                                                                                              |
| 70. Contributions of all guideline group members are valued                                                                                                                                              |
| <b>Group Interaction</b>                                                                                                                                                                                 |
| 71. Having environment for open discussion in the panel meeting, with equal opportunity given to all members to contribute to discussion and speak freely                                                |
| 72. Views of all panel members paid attention to and taken into consideration in panel meeting(s)                                                                                                        |
| 73. Opportunity given for development of interpersonal relationships and establishment of group norms                                                                                                    |
| 74. Mutually respectful relationships fostered between guideline group members                                                                                                                           |
| 75. Avoiding feeling of need to comply, or abide due to status of some group members and views of authority figure or member with most expertise or confidence                                           |
| 76. Individual group or panel members not dominating the discussion                                                                                                                                      |
| 77. Having opportunity for face-to-face discussion                                                                                                                                                       |
| <b>Group Communication</b>                                                                                                                                                                               |
| 78. Communication and conduct of meeting(s) is friendly and professional                                                                                                                                 |
| 79. Method of communication with the guideline development group is appropriate and communication is clear                                                                                               |
| 80. Frequency of communication with the guideline development group is appropriate                                                                                                                       |
| <b>Incentive</b>                                                                                                                                                                                         |
| 81. There are appropriate incentives for participation in the guideline project                                                                                                                          |
| 82. Appropriate credit is given for contributions of guideline group members                                                                                                                             |
| 83. Compensation for involvement in guideline development project                                                                                                                                        |
| 84. There is a perception that involvement in the guideline project will have an impact on health of people                                                                                              |
| <b>Writing the Guideline</b>                                                                                                                                                                             |
| 85. How the writing of the guideline is completed                                                                                                                                                        |

|                                                                                                                                                                                                   |
|---------------------------------------------------------------------------------------------------------------------------------------------------------------------------------------------------|
| 86. Providing input into the draft of the guideline                                                                                                                                               |
| 87. Planning and conducting peer review of the guideline                                                                                                                                          |
| 88. Sufficient time to review the written guideline                                                                                                                                               |
| <b>Implementation and Dissemination Planning</b>                                                                                                                                                  |
| 89. Identification and discussion of research gaps and needs for future research                                                                                                                  |
| 90. Planning for the dissemination of the guideline                                                                                                                                               |
| 91. Planning for the implementation of the guideline and considering barriers                                                                                                                     |
| 92. Planning for the assessment of the impact of the guideline                                                                                                                                    |
| 93. There is discussion and agreement about the format(s) of the guideline (e.g. formats for different end users, such as clinician and patient versions, decision on inclusion of care pathways) |
| <b>Follow-up and Next Steps</b>                                                                                                                                                                   |
| 94. Evaluation of the guideline development process and feedback from guideline group members                                                                                                     |
| 95. Outline for next steps and follow-up clearly communicated to guideline group members                                                                                                          |

**Supplemental Table S5: Generalizability analysis for the PANELVIEW tool**

| Facet                                 | Variance (%) | Interpretation                                                                           |
|---------------------------------------|--------------|------------------------------------------------------------------------------------------|
| Panel                                 | 0.013 (28)   | Variance due to differences between guideline panels                                     |
| Participants:Panel                    | 0.026 (55)   | Variance due to differences between panel members within a panel                         |
| Domain                                | 0.002 (4)    | Variance due to differences between questionnaire domains                                |
| Item:Domain                           | 0.002 (4)    | Variance due to differences between items within domains                                 |
| Panel*Domain                          | 0 (0)        | Variance due to differences between domains for any panel                                |
| Panel*Item:Domain                     | 0.002 (4)    | Variance due to differences between items within domains for any panel                   |
| Participants:Panel*Domain             | 0.001 (2)    | Variance due to differences between domains for panel members within panels              |
| Participants:Panel*Item:Domain        | 0.001 (2)    | Variance due to differences between items within domains for panel members within panels |
|                                       | <b>G</b>     | <b>Interpretation</b>                                                                    |
| Overall generalizability coefficient: | 0.35         | Overall test reliability to differentiate between panel processes                        |

The generalizability analysis was used to determine the extent to which specific variables (i.e. facets) contribute to the PANELVIEW overall scores. This is represented by the proportion of variance accounted for by each facet. Panel members within a specific panel accounted for the largest proportion of the difference in PANELVIEW scores (55%), while differences in scores between panels accounted for the second largest proportion (28%). PANELVIEW survey domains and items within the domains accounted for a small but non-negligible (4%) proportion of the difference in scores. The overall generalizability coefficient represents the extent to which the PANELVIEW scores can differentiate between panel processes (i.e. those viewed overall as appropriate and satisfactory versus those that are not).

\* refers to interaction terms, : refers to nesting of facets within one another (e.g. participants within a guideline panel)

## Supplemental Figure S1: Search strategies

**Database: Ovid MEDLINE(R) In-Process & Other Non-Indexed Citations, Ovid MEDLINE(R) Daily and Ovid MEDLINE(R) 1946 to Present**

**Search Strategy: search terms [number of results]**

- 1 (guideline\* adj4 develop\*).ti,ab. (21336)
- 2 (guideline\* adj4 process\*).ti,ab. (2472)
- 3 program development/ (28171)
- 4 guidelines as topic/ or practice guidelines as topic/ (151293)
- 5 4 and (1 or 2 or 3) (8570)
- 6 (satisf\* or impression\* or challenge\* or perception\* or barrier\*).ti,ab. (1396086)
- 7 attitude\*.mp. (407542)
- 8 6 or 7 (1703467)
- 9 (participant\* or expert\* or panel\*).ti,ab. (1000160)
- 10 5 and 8 and 9 (441)

**Database: Embase 1974 to Present**

**Search Strategy: search terms [number of results]**

- 1 (satisf\* or impression\* or challenge\* or perception\* or barrier\*).ti,ab. (1762953)
- 2 attitude\*.mp. (499561)
- 3 1 or 2 (2145587)
- 4 (participant\* or expert\* or panel\*).ti,ab. (1364650)
- 5 exp practice guideline/ (523532)
- 6 (guideline\* adj4 develop\*).ti,ab. (30241)
- 7 (guideline\* adj4 process\*).ti,ab. (3539)
- 8 6 or 7 (32482)
- 9 3 and 4 and 5 and 8 (825)

## Supplemental Box S1: Literature review methods

We included for data abstraction:

- Qualitative or quantitative studies describing evaluation of the guideline development process
- Qualitative or quantitative studies involving interviews or surveys of panelists on their guideline participation experience

Titles and abstracts and full texts of the identified studies were screened independently in duplicate (WW and TB) for inclusion for data abstraction, with disagreements resolved by a third reviewer. We also screened reference lists of included studies.



## Supplemental Figure S2: Item generation survey questions

Panel members participating in guideline panel meetings were approached to provide their feedback about the process they participated in after the meetings adjourned. They were asked to evaluate the process they participated in by responding to the following questions with free-text comments:

### Survey Questions:

1. What were the steps taken during the meeting that helped along the way and made you satisfied with the process?
2. What were the steps taken prior to the meeting throughout the guideline development process that helped along the way and made you satisfied with the process?
3. Were there any issues that made you dissatisfied with the meeting or the overall guideline development process?
4. Please provide your overall impressions of today's meeting and the entire guideline development process. Is there anything else that was done well or wasn't done well? What do you think are the most important parts of the guideline development process that ensure guideline panel members are satisfied? Please specify.
5. Given what you have covered above, what would you identify as the most important steps of the guideline development process that ensure guideline panel members are satisfied?
6. Is there anything else specific to the guideline development process and panel members' satisfaction or any other aspects you would like to mention?

Supplemental Figure S3: PRISMA flow diagram for item generation systematic review

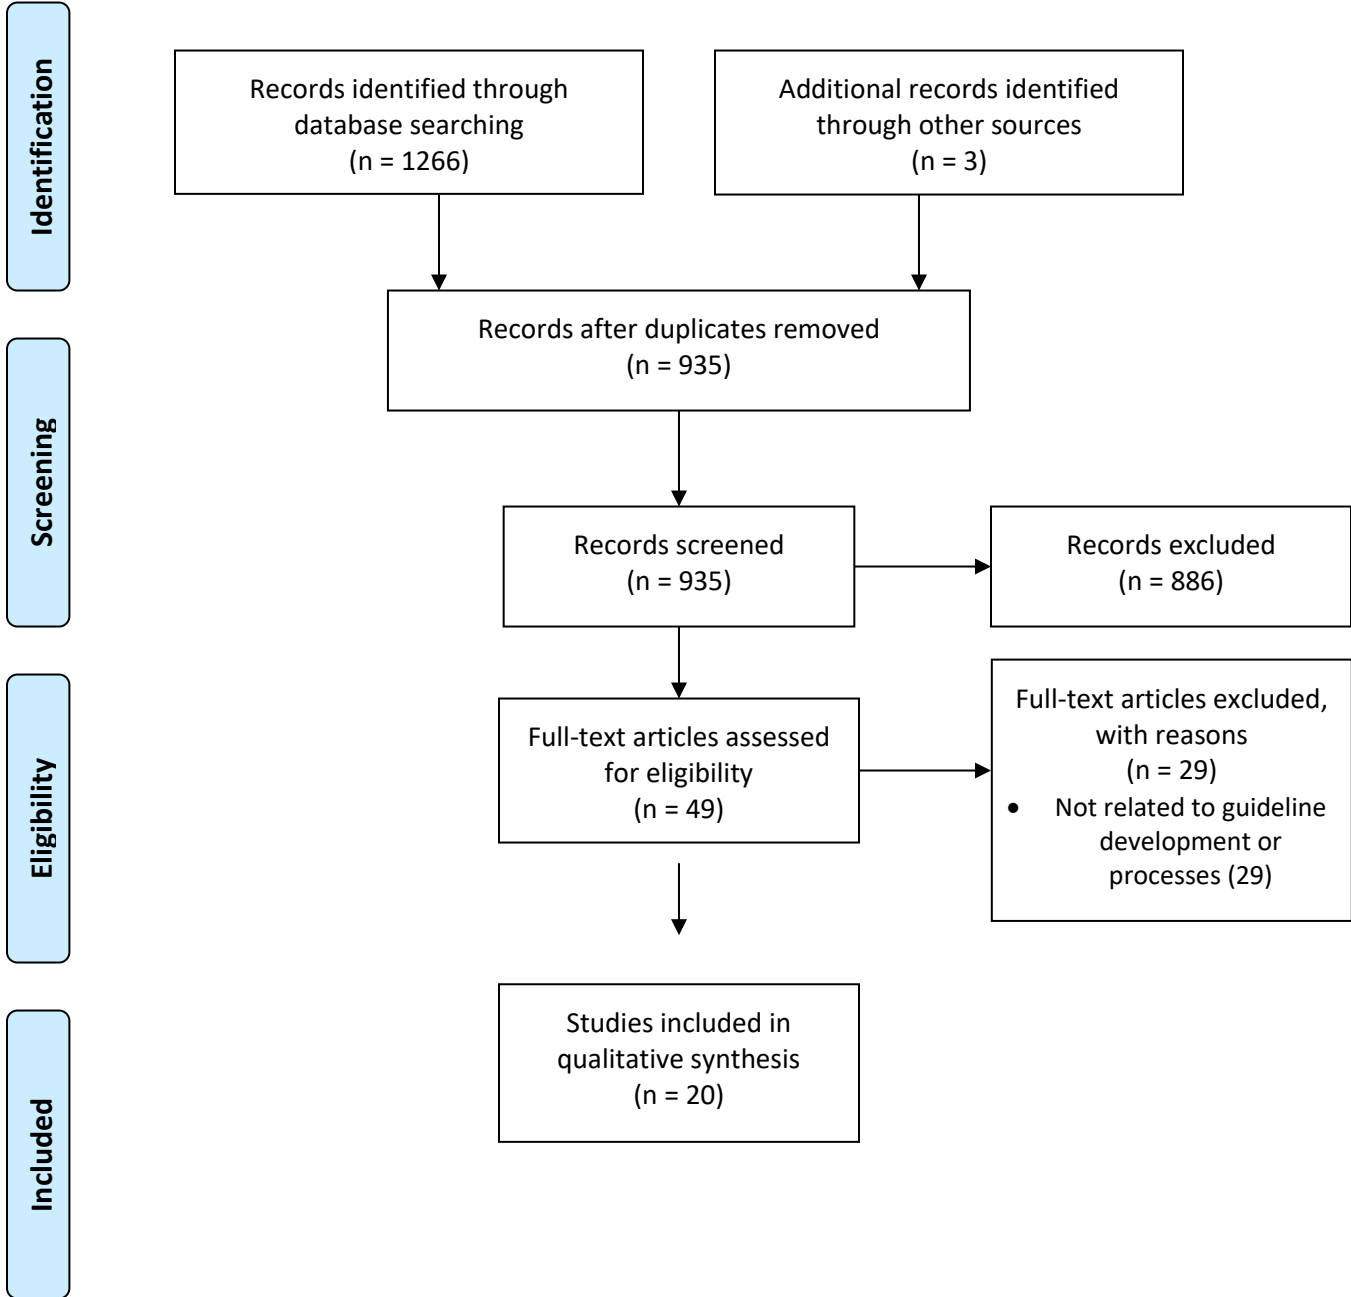

**Supplemental Figure S4: Time to complete the PANELVIEW survey online**

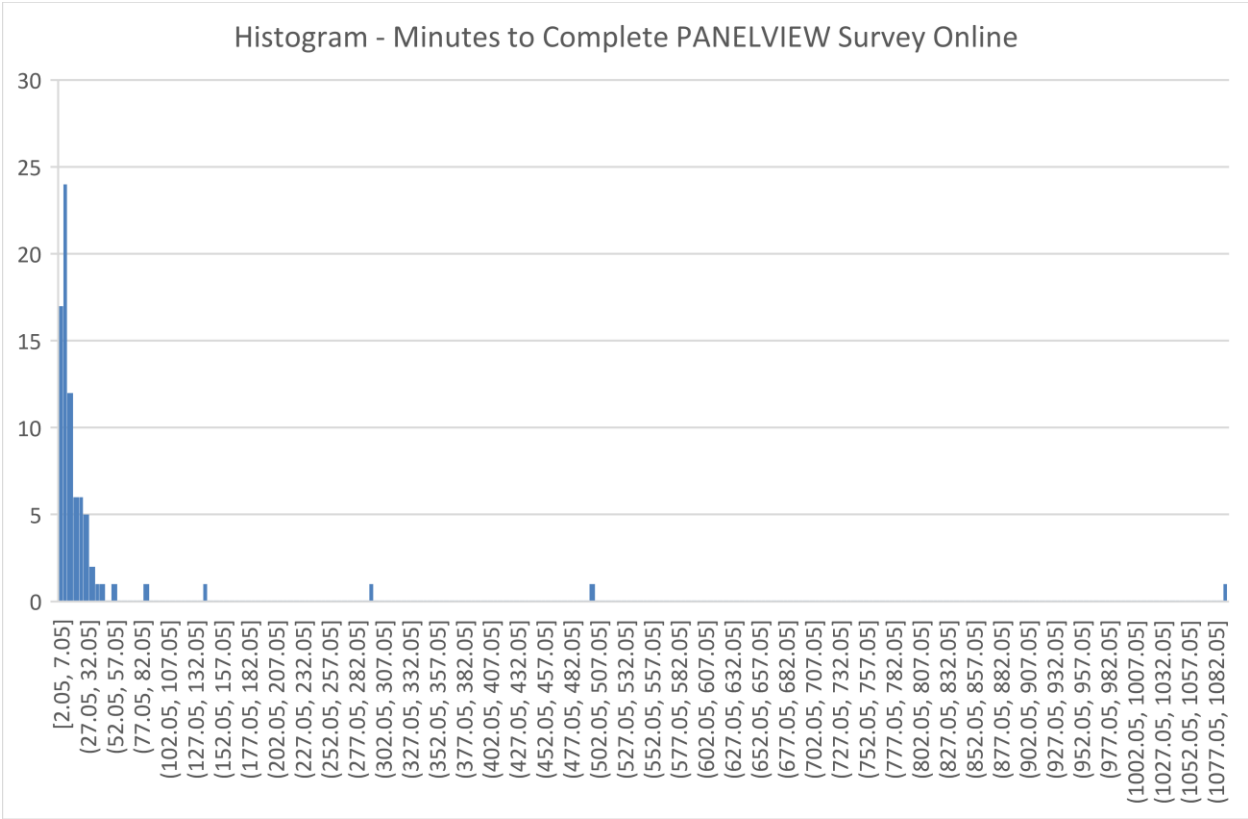

The median time for 80 respondents to complete the PANELVIEW survey was 12 minutes. Removing 12 outliers with a recorded completion time of 30 minutes or longer, who presumably took a break while completing the questionnaire, the median time to complete the survey was 10 minutes and the mean time was 12 minutes.

**Supplemental Figure S5: Generalizability analysis model**

Abbreviations: group (g), participants (p), domain (d), item (i)

ANOVA TABLE

| Effect | df   | T          | SS         | MS       | VC      |
|--------|------|------------|------------|----------|---------|
| g      | 7    | 112.98131  | 112.98131  | 16.14019 | 0.01267 |
| p:g    | 86   | 1009.17561 | 896.19430  | 10.42086 | 0.28621 |
| d      | 14   | 139.78726  | 139.78725  | 9.98480  | 0.01869 |
| i:d    | 19   | 249.58278  | 109.79553  | 5.77871  | 0.05064 |
| gd     | 98   | 378.62434  | 125.85578  | 1.28424  | 0.00392 |
| gi:d   | 133  | 618.22949  | 129.80962  | 0.97601  | 0.04870 |
| pd:g   | 1204 | 2016.78894 | 741.97030  | 0.61625  | 0.09356 |
| pi:gd  | 1634 | 2924.85598 | 668.46189  | 0.40910  | 0.40910 |
| Mean   |      | 0.00000    |            |          |         |
| Total  | 3195 |            | 2924.85598 |          |         |

The calculated grand mean = 6.2560

This value has been subtracted from the actual scores for the calculations.

Facets

|     |                 |
|-----|-----------------|
| 'g' | Differentiation |
| 'p' | Random          |
| 'd' | Fixed           |
| 'i' | Fixed           |

| Pattern | Var. Comp. | Levels        | Signature | Rule                |
|---------|------------|---------------|-----------|---------------------|
| g       | 0.013      | 1.00          | d         | tau only            |
| p:g     | 0.026      | 10.98         | dr        | Delta and delta     |
| d       | 0.002      | 11.33         | f         | does not contribute |
| i:d     | 0.002      | 25.72         | f         | does not contribute |
| g d     | 0.000      | 11.33         | df        | tau only            |
| g i:d   | 0.002      | 25.72         | df        | tau only            |
| p:g d   | 0.001      | 10.98 * 11.33 | dfr       | Delta and delta     |
| p:g i:d | 0.001      | 10.98 * 25.72 | dfr       | Delta and delta     |

RESULTS:

- s<sup>2</sup>(T) = 0.015
- s<sup>2</sup>(D) = 0.028
- s<sup>2</sup>(d) = 0.028
- Er<sup>2</sup> = 0.345
- Phi = 0.345

$$G\text{-coefficient} = \frac{\sigma_g^2 + \sigma_d^2 + \sigma_{i:d}^2}{\sigma_g^2 + \sigma_d^2 + \sigma_{i:d}^2 + \sigma_{p:g}^2 + \sigma_{p:g|d}^2 + \sigma_{p:gi:d}^2}$$
